# Supplementary material
Source: Springer Nature journal article supplement (https://www.springermedizin.de/resource/supplementary/12913_2008_957_MOESM4_ESM.pdf/9536550)
Supplement: MOESM4 [file 9536550]

|               |                                                   | <b>Outcome: retention or provision of care in</b>                                                                                                                                                        |                                                                                                                                                                                                                                                                                                                                                                                   |
|---------------|---------------------------------------------------|----------------------------------------------------------------------------------------------------------------------------------------------------------------------------------------------------------|-----------------------------------------------------------------------------------------------------------------------------------------------------------------------------------------------------------------------------------------------------------------------------------------------------------------------------------------------------------------------------------|
|               |                                                   | Same area                                                                                                                                                                                                | Any underserved area                                                                                                                                                                                                                                                                                                                                                              |
| <b>Sample</b> | All physicians                                    | <p><i>Retention in the same area:</i></p> <p>Holmes 2004 [53]<br/>Pathman et al. 2004 [48]</p>                                                                                                           | <p><i>Provision of care in any underserved area:</i></p> <p>Brooks et al. 2003 [11]<br/>Holmes 2004 [53]<br/>Inoue et al. 2007 [59]<br/>Matsumoto et al. 2008 [60]<br/>Pathman et al. 2000 [85]<br/>Probst et al. 2003 [52]<br/>Rabinowitz et. al. 2000 [84]<br/>Rabinowitz et al. 2001 [88]<br/>Rittenhouse et al. 2008 [65]<br/>Xu et al. 1997 [86]<br/>Xu et al. 1997 [87]</p> |
|               | Physicians who initially worked in an underserved | <p><i>Retention in the same underserved area:</i></p> <p>Jackson et al. 2003 [58]<br/>Pathman et al. 1992 [81]<br/>Pathman et al. 1994 [12]<br/>Pathman et al. 1994 [82]<br/>Singer et al. 1998 [83]</p> | <p><i>Retention in any underserved area:</i></p> <p>Pathman et al. 1992 [81]<br/>Pathman et al. 1994 [12]</p>                                                                                                                                                                                                                                                                     |
